# Supplementary material for: Comprehensive Proteomic Profiling of Wheat Gluten Using a Combination of Data-Independent and Data-Dependent Acquisition
Source: Front Plant Sci. 2017 Jan 10;7:2020. doi: 10.3389/fpls.2016.02020 (PMC5223596; doi:10.3389/fpls.2016.02020)
Supplement: Supplementary file 2 [file DataSheet1.XLSX]

## Sheet: Sheet1
Data Sheet S1: Summary of protein accessions identified in the different extracts using the QTOF and LTQ, when a minimum of 3 unique criteria was applied. The normalised relative abundance for the top three ionising peptides in each technical replicate is included. Protein accessions and their corresponding number of peptides highlights in blue are the important HMW glutenin subunits referred to …
Accession	Protein accession corresponding to UniProt Entry
Peptide Count	Total number of peptides identified for the corresponding protein
No of unique peptides	Number of unique peptides identified for the corresponding proteins
Confidence Score	The derived protein identification probability
Sample	Refers to the biological and technical sample across the different extractions (E1 - E3)
Mass spectrometry platform	UNIPROT accession number	Peptide count	No of unique peptides	Confidence score	Realtive normalised abundance of top three peptides.
					HW G E3 1.1	HW G E3 1.2	HW G E3 1.3	HW G E3 2.1	HW G E3 2.2	HW G E3 2.3	HW G E2 1.1	HW G E2 1.2	HW G E2 1.3	HW G E2 2.1	HW G E2 2.2	HW G E2 2.3	HW G E1 1.1	HW G E1 1.2	HW G E1 1.3	HW G E1 2.1	HW G E1 2.2	HW G E1 2.3
QTOF	Q6UKZ5	59	20	385.197	12959.4	34330.1	33605.9	88998.8	86585.2	82277	87624.4	83518.8	79877.7	124030	124179	114629	71210.8	65593	70557.9	74313.2	71333.9	73412
	P93794	63	15	396.742	69487.2	53440.3	50235.9	94910.3	94230.1	89135	81136.2	83158.2	79565.6	82195.6	79124.4	78209.3	26947.1	24246	26706.4	25719.1	25131.7	23409.8
	A0MZ38	51	13	283.868	3476.7	9032.96	8505.46	22195.6	21742	20857.3	11945.4	11948.8	11330.9	15426.9	15238.3	15325.3	16885.1	15182.2	16680.8	13009.2	13427.8	13451.7
	Q6Q7J1	58	13	372.427	2784.13	11442.9	11134.5	28095.4	26684	25469.2	11370.8	11152.4	11107.9	15157.1	14903.6	14936.8	12858	12195.6	13500.5	17830	17556.7	18286.4
	R9XUY1	13	11	84.1757	413.012	10167	9509.16	52756.7	54329	51716.7	28637.4	26244.3	25893.8	31308.9	29678.6	30492.9	69732	62426.3	66986	67139.1	63865	65445.3
	I3QPG6	32	10	178.067	2717.36	18142.7	17674.2	20136.6	20011.1	19144.5	34075.5	32814.1	31544.4	21779.6	20978	20879.9	6370.85	6059.05	6456.8	13086.5	13279.5	14185
	Q5MFN8	22	10	131.018	590.367	6675.04	6617.87	23539	22944.8	22131	17699.3	16346.2	14815.8	21276.7	21028.6	20355.7	3367.97	2801.93	3254.36	5055.05	5011.34	5257.74
	P16315	18	10	115.922	736.984	14107.7	13780.3	34831.4	34115.2	32679.9	51644.5	50463.4	48411	38192.5	37619.1	37098	36978.2	34455.2	38713.4	35131.8	35352.9	37590.5
	D0IQ05	64	8	414.073	38169.2	2019.07	2322.89	14019.6	13850.7	13126.2	36077	35234.2	32888.5	13957.1	13981.4	12711.7	7375.24	6674.62	7512.54	13330.1	12922	13262.1
	Q599I0	84	8	560.559	2434.69	72.8728	72.5838	1224.67	1052.78	861.604	17808.2	17119.2	16369.4	1791.93	1651.87	1446.78	734.844	681.576	720.158	3073.5	3406.57	3287.99
	A2IBK1	22	7	123.049	10.179	708.833	576.164	7218.41	7078.89	6858.07	3270.99	3728.17	3217.79	7473.81	7364.64	7200.58	737.518	651.652	730.819	406.526	463.269	459.523
	Q5MFH0	60	7	372.075	919.135	3353.5	2956.38	15780	16793.7	16001.1	15110.7	13972.9	11961.1	15002.1	16092.4	14463.7	3582.73	3435.19	3730.66	4159.32	3604.39	3975.61
	Q1KL95	54	6	360.634	1276.86	1340.9	1365.68	9334.6	9165.57	8128.13	6609.02	6844.85	6419.14	9840.75	9639.97	9385.16	6713.93	6254.11	7150.66	6658.31	6557.83	6738.95
	U5UA46	8	6	40.4457	14408.3	9700.52	6426.82	75294.3	74611.6	70032.1	27423.7	28158.9	27696.3	47089.4	43752.2	44530.2	83632.4	75383.7	80389.7	95229.3	97096.8	95706.2
	C3VN76	60	6	360.692	94.2219	3481.69	3160.24	40701.3	38680.5	36494.2	20652.6	18939.2	19071	27745.8	27059.8	27744.8	40859.2	36461.3	38294.7	43844.5	44302.2	45349
	Q6QGW0	64	6	399.213	1684.03	8636.49	8183.43	16095.8	15944.5	14728.6	21875.4	21059.7	20617.3	14910.2	14695.6	14488.2	6165.91	5402.78	5977.01	5157.54	5056.29	5164.54
	H6VLP7	22	6	172.06	1012.08	4331.58	4150.72	33830.2	33410.1	31288.5	11341.2	11302.7	10488.5	32190.1	30066.5	30461	14162.8	12954.2	14085.8	6993.98	6950.77	7327.2
	Q0GNG1	32	6	194.463	11749.3	4958.54	5343.31	21238.4	20380	19289.8	13285.8	12793.4	12275.8	22158.7	21069.7	20533.1	18810.2	16174.6	18113.4	17079.9	17758.8	17779.7
	Q9M4L8	19	5	146.958	8685.57	4829.36	4839.03	9825.91	8572.55	7251.02	11284.9	12187.9	13774.5	11676.3	13923.9	10348.9	374.361	361.193	377.295	933.112	721.45	859.126
	D0ES80	12	5	69.8621	368.489	1227.37	1099.17	14678.3	14524.9	14078	4042.14	3416.85	3685.95	11127	11576.3	10186.7	6298.52	4989.35	5135.27	3512.8	3478.57	3631.99
	K7WV92	45	5	305.516	254388	108391	102648	299063	301959	283472	268377	262397	250238	347067	340556	334764	86169.9	77785.9	86659.4	72809.6	72984.1	76307
	A2IBK0	24	5	133.305	372.208	330.642	369.691	1729.79	1549.88	1507.26	1321.28	1072.83	1175.68	953.614	803.598	946.165	1965.88	1745.08	1794.96	3196.97	3247.33	3168.7
	X2KS61	22	5	161.51	1382.52	5579.36	5683.2	28503.1	27700.1	25680.1	13997.2	14161.4	13094.7	16531.9	16226.6	15948.5	5658.02	5355.07	5807.83	10323.4	10902.1	10928
	B6UKN3	17	5	107.564	1429.59	7443.69	7956.42	19780.9	19465.3	18231.7	9398.48	9016.69	8911.4	9253.6	9132.53	9309.73	24520.3	21760.5	21096.7	24647.9	25118.6	25985.8
	I0IT60	23	5	172.252	0	5604.26	5392.41	2481.48	2311.35	2252.1	19030.8	17798.2	15390.8	5849.93	5700.5	5728.99	1143.22	964.097	1204.37	7851.45	6940.34	7844.09
	Q0PW10	19	5	118.579	0	25704.3	25345.7	15702.7	15601.8	14195	26782.8	26318.2	23869.7	19143	17873.9	15798.3	213.492	175.17	219.833	104.94	186.99	157.213
	A5HMG1	44	5	282.607	1038.41	13838.4	13328.4	7678.48	7863.11	7331.64	30156.2	30813.4	28367.8	16790.7	16253.1	16291.1	2430.62	2025.31	2432.23	10701.9	10417.6	11416.6
	R9XUW9	24	4	152.224	74.1918	2146.32	2256.21	18107.7	18747.5	17262.4	9409.58	10267	9394.25	19150.1	17590.1	17225.4	4867.86	4230.9	4499.53	5691.28	6135.49	5766.86
	B2LS34	30	4	190.938	77.6094	9553.62	9112.36	7392.95	7391.77	6685.7	7753.12	7691.08	7179.85	7701.08	7818.58	7342.29	3485.49	3268.08	3576.31	3149.19	3498.87	3414.96
	R9XVB6	50	4	312.601	1427.16	2234.4	2261.62	13388.5	12910.6	13210	6477.34	6664.24	6201.36	10433.7	9977.56	9933.24	10723.8	9932.15	10540.1	6314.8	5465.81	5500.18
	C8KIL6	25	4	152.772	0	416.515	323.014	4025.49	3926.9	3990.98	12711.4	10793.1	8798.57	6163.41	5634.42	4759.02	322.098	397.367	358.832	144.57	120.631	170.81
	B6UKM6	16	4	94.1157	0	50.5205	46.4467	1251.62	997.793	926.33	476.201	504.619	364.407	1504.52	1467.02	1436.88	990.714	939.007	1007.34	404.856	411.542	384.753
	Q41530	28	4	206.309	27.674	6393.14	6075.95	4136.87	4145.74	3654.3	9055.31	8962.46	8173.38	6621.88	6562.61	6416.63	88.0075	86.0062	80.2438	1052.71	1019.09	899.808
	B2Y2R5	18	4	90.7462	7.22799	1188.34	1129.97	6386.98	6262.21	6346.93	1462.69	1679.64	1751.41	2860.44	2597.38	2649.53	9097.6	8084.31	9039.98	10201.2	10874.2	11581.5
	J7HSR5	23	4	161.813	2403.92	13989.2	13584.4	20472.9	21768.8	20607.9	39622.4	37993.6	36616.3	30547	30072.9	28963.1	20109.7	18202.4	20146.4	21733.6	22362.8	22914.8
	R9XV56	14	4	96.443	0	4663.32	4489.81	18016.2	18295.2	16198.2	10594.7	9747.74	9857.28	14006.8	13763.6	13123.4	3684.32	3140.95	3165.86	3438.54	3354.52	3652.64
	R9XV39	28	4	207.848	0	21191.1	20736.5	75493.5	75084.2	72282	21230.1	20987.3	20324.8	64956.6	65279.8	65260.6	70466.7	64066.6	70703.5	49050.9	48792	49190.4
	R9XSU2	29	4	218.738	0	29079.8	27803.9	8111.94	7785.35	7294.57	38513.3	35290.2	34896	14954.5	14660.6	15236.6	1533.07	1376.34	1284.66	10171.5	10256.4	10796.6
	R9XUS6	8	4	42.3459	16759.7	73845.1	72367.9	74186.5	76347.9	73517.5	84569.4	82391	79788.2	82908.8	82614.8	83615.6	70584.4	64751.6	72483.7	68447.4	67890	71562.4
	Q8W3V7	33	3	169.865	0	0	0	15767	15717.9	13924.7	6797.84	6122.76	5641.64	12620.3	12612.7	11599.3	1098.33	951.542	909.794	902.619	758.827	930.385
	A5JSB7	13	3	92.3507	279.087	520.418	543.062	1563.01	1482.83	1417.97	1453.06	1425.88	1349.53	840.734	794.196	833.419	1309.79	1126.39	1349.8	2155.89	2027.31	2112.36
	J7I026	15	3	110.071	9386.17	4406.29	4225.93	1564.14	1681.42	1527.83	8945.53	8656.39	8544.08	1695.34	1844.37	1549.85	1564.84	1179.83	1410.28	1291.61	1365.38	1331.12
	A5JSA6	19	3	129.607	11.1193	2326.34	2184.97	1024.95	961.062	1009.7	5424.81	5349	4880.95	3039.47	2777.47	2729.06	3.77749	0	6.80235	154.672	144.301	139.71
	M4M8L5	43	3	279.183	0	65.0967	48.5019	1600.47	1383.66	1681.26	639.636	605.092	692.48	1254.67	1118.15	1247.44	3417.97	2916.07	3482.54	3584.71	3336.53	3743.02
	Q8W3V8	31	3	164.426	0	201.365	255.765	138.855	9.44951	80.5011	4189.1	3662.06	3109.05	606.134	452.503	476.913	0	0	0	4.73233	0	0
	C3VN79	15	3	80.0954	0	296.883	348.637	3031.8	2705.73	2726.94	310.203	262.872	398.062	1043.24	770.408	873.12	4579.18	4100.26	4552.45	7381.7	7085.72	7160.49
	I3XHQ2	28	3	169.571	16.191	29590	27343.6	54555.9	55456.9	50345.4	62928.5	62169.7	56858.6	58739.9	59858.7	55615	7217.31	6460.95	6438.48	19095.9	19317.9	19076.6
	I0IT62	7	3	40.6393	214.898	1801.55	1759.63	2643.85	2701.64	2651.98	2204.46	2190.99	1859.44	2084.15	2056.28	1941.08	501.814	481.634	498.048	611.833	619.052	587.222
	F8SGP8	29	3	154.275	0	562.979	337.329	2641.51	2477.07	2508.49	564.969	666.342	741.72	1602.78	1512.27	1510.25	2086.4	1888.81	2057.3	2140.01	1937.97	1838.13
	F8SGL5	13	3	73.2349	0	3493.7	3555.54	4119.24	4308.41	3999.49	3918.67	3548.12	3578.67	4247.67	4256.38	4020.8	3043.77	3014	3113.36	2931.17	2854.6	3060.09
	Q8W3V0	47	3	285.257	0	7110.58	7141.06	7857.81	6778.57	6905.9	9333.48	8861.31	8044.73	6995.68	7181.4	7130.02	4288.78	4018.36	4381.64	6019.27	6293.37	6186.15
Mass spectrometry platform	UNIPROT accession number	Peptide count	Unique peptides	Confidence score	HW G E1 1.1	HW G E1 1.2	HW G E1 2.1	HW G E1 2.2	HW G E2 1.1	HW G E2 1.2	HW G E2 2.1	HW G E2 2.1	HW G E3 1.1	HW G E3 1.2	HW G E3 2.1	HW G E3 2.2
LTQ	P00489	11	10	29.05	712221	24851.2	1.16299e+06	1.2097e+06	983189	1.2093e+06	365445	243732	433780	575828	675207	505977
	P16315	24	8	483.73	15891	31678.2	19725.7	22934.6	93188.8	110949	91454	85424.4	61321.1	137854	76721.3	85854
	P93794	40	6	723.56	24808.3	13070.2	16092	17456.3	50173.4	28961.3	46915.6	58410.1	63754.1	29036.6	76036.2	62571.5
	D0IQ05	42	6	1031.99	3715.27	45946.1	1597.48	7536.27	11415.5	13294.3	16589	16312.4	22646.9	12860.6	23897.8	22479
	M4M8L5	31	5	743.92	6303.63	920.452	5892.06	5877.16	24448.7	44336.9	41623.5	48785.8	59771.9	37339.2	61134.9	57386
	J7I026	24	5	468.86	11157.6	8.90449	14648	3766.33	17606.8	76133.6	27867.3	19886.5	5618.51	183270	32021.3	18951
	F8SGL6	28	4	469.01	46864.3	25842.9	101799	128519	16384.3	20401.1	12491.2	9002.41	16774.2	33424.7	23336.6	15049.7
	F4YT72	35	4	759.22	7022.11	8119.19	4989.39	19874.2	60860.9	45549.2	65565.2	84378	70612.7	45882.7	86932.3	81719.6
	R9YTM7	39	4	764.26	132855	95651.1	162828	145338	430927	372376	470769	490603	451010	235534	261372	432817
	I0IT60	32	4	836.89	13768.9	35074	15088.5	19591.2	80722.6	203340	122485	107041	81647.1	342808	95771	84026.2
	H6VLP7	17	4	408.71	11876.1	779.708	38958.5	41260.6	47087.8	29835.5	32242.9	36506.1	47534.9	35058.9	38339	40583.4
	B2Y2R5	34	4	630.52	181998	22455.5	113376	99815.7	117119	110659	115134	114445	139930	126472	135303	136120
	K7WVB5	22	3	385.09	13715.6	5207.72	25729.9	45894.1	143462	174166	216511	220524	167536	205332	108012	172156
	R9XUE1	48	3	908.21	61761.6	47612.5	28379.3	28510.9	69683.2	77046.6	92172.9	91936.1	71010.5	98560.9	79898.4	79692.8
	R9XT57	22	3	411.04	27000.8	9777.29	148403	71748	717536	359581	418238	579475	409623	207780	484757	553851
	U5U6L8	12	3	241.6	41158.8	26664.7	16147.1	23305.1	363202	169508	254477	361852	516345	117530	623129	479907
	B6DQB9	32	3	693.28	14389.9	9326.58	54451.5	23702.8	62766.5	75016.2	63550.3	52669.7	51439	70333.7	106485	75951
	I0IT59	34	3	821.25	771.803	339.547	975.484	3011.45	18005	54637.8	31374.6	25314.3	11875.9	99288.4	17063.2	19296.6
	J7HT14	24	3	449.1	30369.8	8296.86	29285.7	24831.9	46919.3	50604.2	16411.3	22949.2	36774.8	27303.9	40245.3	36052.7
	R9XWH8	22	3	340.98	57410	940.425	65998.6	50909.6	44264.6	40265.1	66770.9	132969	66693	58658.8	42351.1	53283.6
	Q9M4L8	27	3	559.91	34350.2	1381.37	42457.8	27460.3	37962.1	59505	11707.8	18388.6	12836.9	41901.5	39532.1	31410.4
	B6UKM6	22	3	570.79	7172.4	158.383	4849.27	3753.64	2905.78	8079.47	5619.28	3135.46	4019.55	32555.8	10508.1	3961.15
